# Supplementary material for: Roles of highly ordered mesoporous structures of Fe–Ni bimetal oxides for an enhanced high-temperature water-gas shift reaction activity
Source: Royal Society of Chemistry journal article supplement (doi:10.1039/d1cy00164g), 2021-01-01
Supplement: d1cy00164g1.pdf [file d1cy00164g1.pdf]

**Supplementary material**

**Roles of highly ordered mesopore structures of Fe-Ni bimetal oxide for an  
enhanced high temperature water-gas shift reaction activity**

**Yong Min Park, Jae Min Cho, Gui Young Han, Jong Wook Bae\***

School of Chemical Engineering, Sungkyunkwan University (SKKU), 2066 Seoburo, Suwon,  
Gyeonggi-do, 16419, Republic of Korea

**Table S1.** Summarized results of XRD analysis of the m-FeNi catalysts such as the crystalline and strain natures derived from Rietvelt and Williamson-Hall plot method

| Catalyst    | Main peak (104) position ( $2\theta$ ) | Crystallite size (nm) <sup>a</sup> | Microstrain (%) <sup>a</sup> | Strain of lattice (%) <sup>b</sup> |
|-------------|----------------------------------------|------------------------------------|------------------------------|------------------------------------|
| m-FeNi(0)   | 33.19                                  | 16.4                               | 0.20                         | -                                  |
| m-FeNi(0.1) | 33.17                                  | 11.5                               | 0.16                         | 0.18                               |
| m-FeNi(0.2) | 33.16                                  | 10.1                               | 0.07                         | 0.22                               |
| m-FeNi(0.5) | 33.15                                  | 11.7                               | 0.30                         | 0.15                               |
| m-FeNi(1)   | 33.10                                  | 12.2                               | 0.40                         | 0.18                               |

<sup>a</sup>The data was obtained after the refinement of Fe<sub>2</sub>O<sub>3</sub> spectra from raw XRD data by Rietvelt's method. The crystallite sizes and microstrains were derived by a Williamson-Hall plot method and by plotting all Fe<sub>2</sub>O<sub>3</sub> peaks in the range of  $2\theta = 24$  to  $89^\circ$ .

<sup>b</sup>The strains of lattice were calculated by a direct linear plot method from the characteristic Fe<sub>2</sub>O<sub>3</sub> peaks in the range of  $2\theta = 24$  to  $89^\circ$  with the assumption of the stretched lattice of the m-FeNi based on that of the reference m-Fe<sub>2</sub>O<sub>3</sub> (m-FeNi(0)).

**Table S2.** Summarized catalytic performance and deactivation rate of WGS reaction on the m-FeNi catalysts<sup>a</sup>

| Catalyst    | CO conversion (mol%) | CO <sub>2</sub> selectivity (mol%) | CH <sub>4</sub> selectivity (mol%) | Deactivation rate (mol%/h) |
|-------------|----------------------|------------------------------------|------------------------------------|----------------------------|
| m-FeNi(0)   | 12.5                 | 88.5                               | 11.5                               | 0.37                       |
| m-FeNi(0.1) | 70.6                 | 82.1                               | 7.9                                | 0.16                       |
| m-FeNi(0.2) | 74.7                 | 96.0                               | 4.0                                | 0.01                       |
| m-FeNi(0.5) | 72.5                 | 91.3                               | 8.7                                | 0.37                       |
| m-FeNi(1)   | 72.4                 | 72.7                               | 27.3                               | 0.74                       |

<sup>a</sup>The catalytic activity such as CO conversion and selectivity of CO<sub>2</sub> and CH<sub>4</sub> was measured at T = 400 °C, P = 0.1 MPa, weight hour space velocity (SV) of syngas with 5200 (ml/(g<sub>cat</sub>·h)) and a feed gas composition of N<sub>2</sub>/CO/H<sub>2</sub>/H<sub>2</sub>O/CH<sub>4</sub>/CO<sub>2</sub> = 4/6.3/46.4/28.2/5.5/9.7 (H<sub>2</sub>O/CO molar ratio of 4.5 with a typical composition of the reformat after steam reforming of propane. The deactivation rate (mol%/h) was represented by the average CO conversion between an initial value of 1 – 5 h and that of a steady-state of 16 – 20 h.

**Table S3.** Summarized XPS results of the fresh and used m-FeNi catalysts<sup>a</sup>

| Catalyst    | Surface ratios of the representative chemical species (fresh / used) <sup>a</sup> |                                    |                                      |                                                                           |
|-------------|-----------------------------------------------------------------------------------|------------------------------------|--------------------------------------|---------------------------------------------------------------------------|
|             | Fe <sup>3+</sup> /Fe <sup>2+</sup>                                                | Ni <sup>3+</sup> /Ni <sup>2+</sup> | S(I <sub>Ni</sub> /I <sub>Fe</sub> ) | S(I <sub>Ni</sub> /I <sub>Fe</sub> )/B(I <sub>Ni</sub> /I <sub>Fe</sub> ) |
| m-FeNi(0)   | 0.87 / 2.26                                                                       | - / -                              | 0 / 0                                | 0 / 0                                                                     |
| m-FeNi(0.1) | 0.97 / 1.93                                                                       | - / 1.29                           | 0.21 / 0.10                          | 1.66 / 0.82                                                               |
| m-FeNi(0.2) | 0.79 / 1.98                                                                       | 0.90 / 2.07                        | 0.49 / 0.34                          | 1.94 / 1.36                                                               |
| m-FeNi(0.5) | 0.84 / 1.84                                                                       | 1.34 / 1.87                        | 0.81 / 0.46                          | 1.62 / 0.92                                                               |
| m-FeNi(1)   | 0.86 / 1.97                                                                       | 1.37 / 1.73                        | 1.31 / 0.91                          | 1.31 / 0.91                                                               |

<sup>a</sup>Surface composition ratios of the Fe<sup>3+</sup>/Fe<sup>2+</sup> and Ni<sup>3+</sup>/Ni<sup>2+</sup> were calculated by integrating the peak intensity of Fe 2p<sub>3/2</sub> assigned to Fe<sup>3+</sup> (~712 eV, Fe<sub>2</sub>O<sub>3</sub> hematite) and Fe<sup>2+</sup> (~710.8 eV, Fe<sub>3</sub>O<sub>4</sub> magnetite and FeO) as well as Ni 2p<sub>3/2</sub> appeared at ~857 eV for Ni<sup>2+</sup> (NiO) and ~855 eV for Ni<sup>3+</sup> (Ni<sub>2</sub>O<sub>3</sub>) on the fresh and used m-FeNi catalysts. The surface to bulk composition ratio of S(I<sub>Ni</sub>/I<sub>Fe</sub>)/B(I<sub>Ni</sub>/I<sub>Fe</sub>) was calculated by using the peak intensity ratio of the surface S(I<sub>Ni</sub>/I<sub>Fe</sub>) ratio measured by surface sensitive XPS analysis to the bulk intensity B(I<sub>Ni</sub>/I<sub>Fe</sub>) ratio measured by XRF analysis on the fresh and used m-FeNi catalysts.

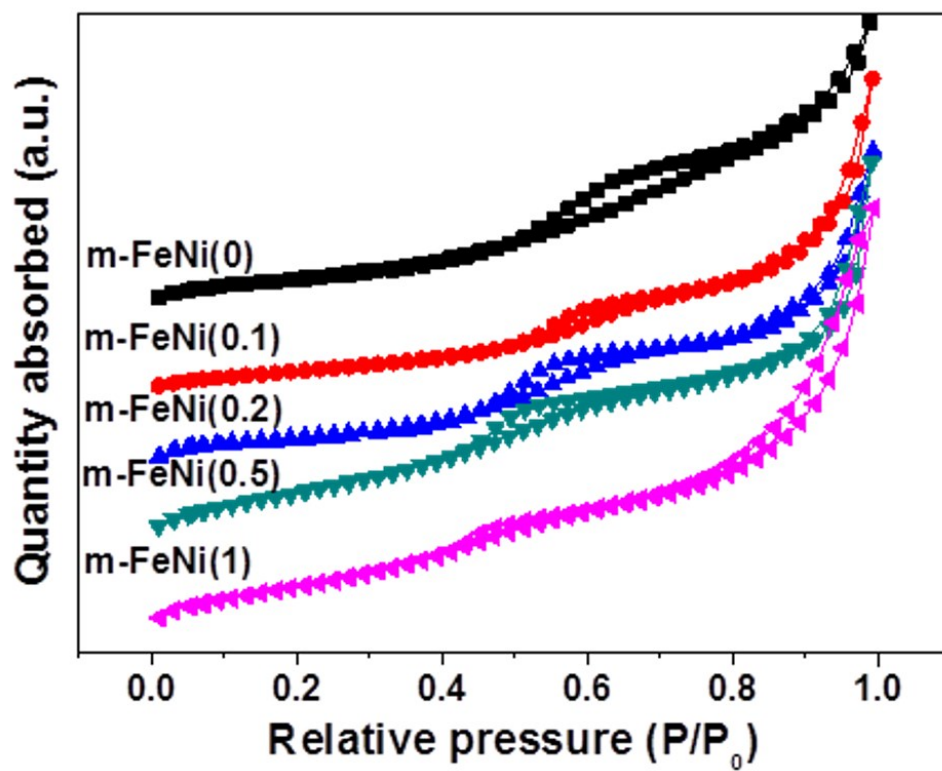

**Figure S1.** N<sub>2</sub> adsorption-desorption isotherms of the as-synthesized fresh m-FeNi catalysts

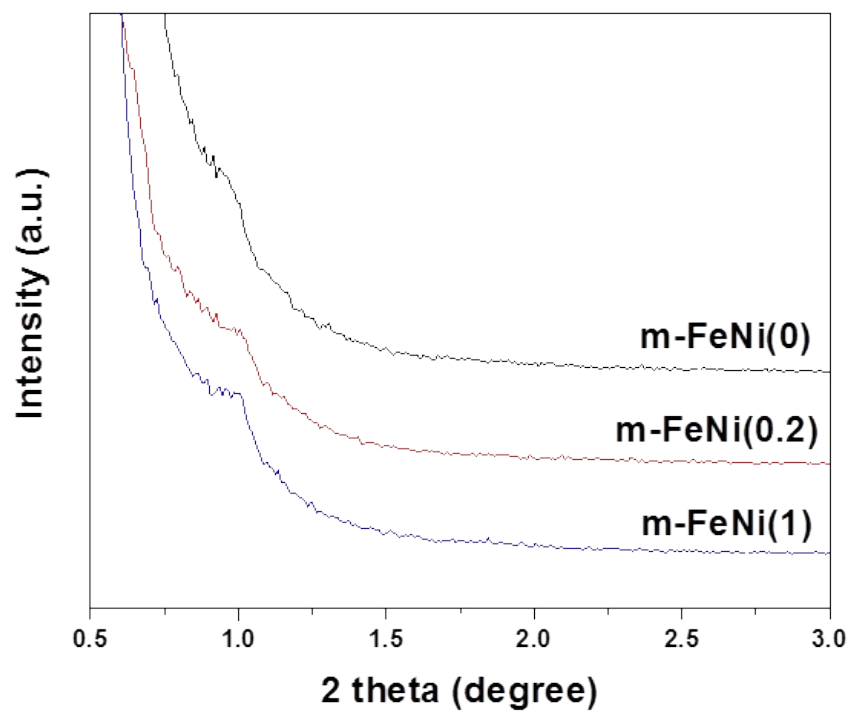

**Figure S2.** Small-angle X-ray scattering (SAXS) spectra of the as-synthesized m-FeNi catalysts

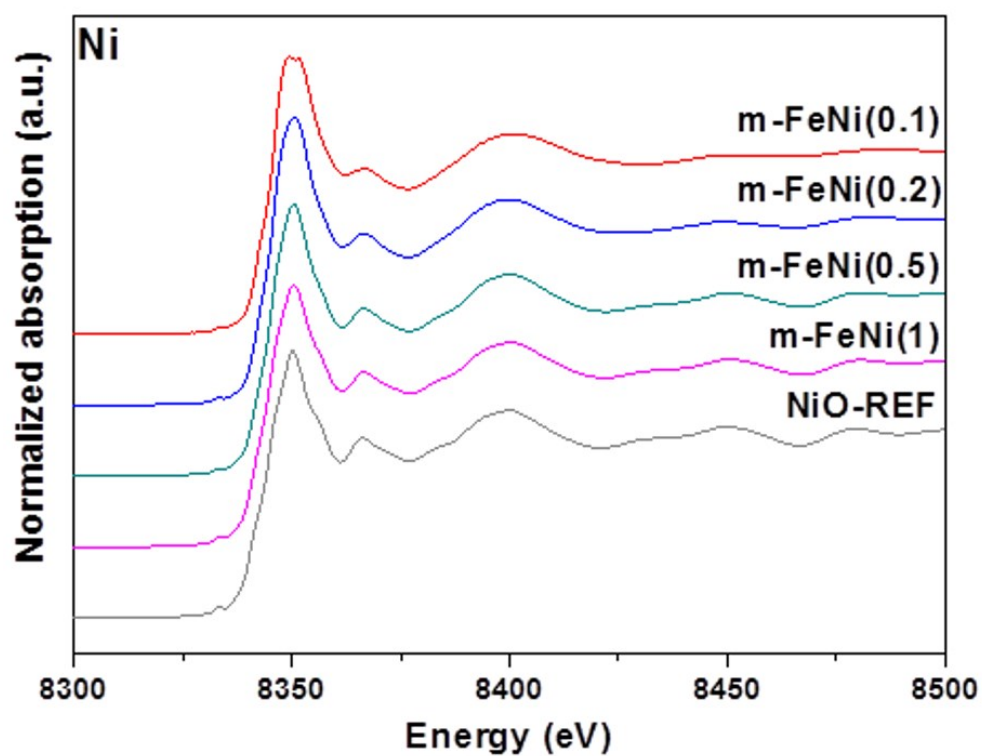

**Figure S3.** X-ray absorption fine structures (XAFS) spectra of Ni K-edge from the as-synthesized fresh m-FeNi catalysts

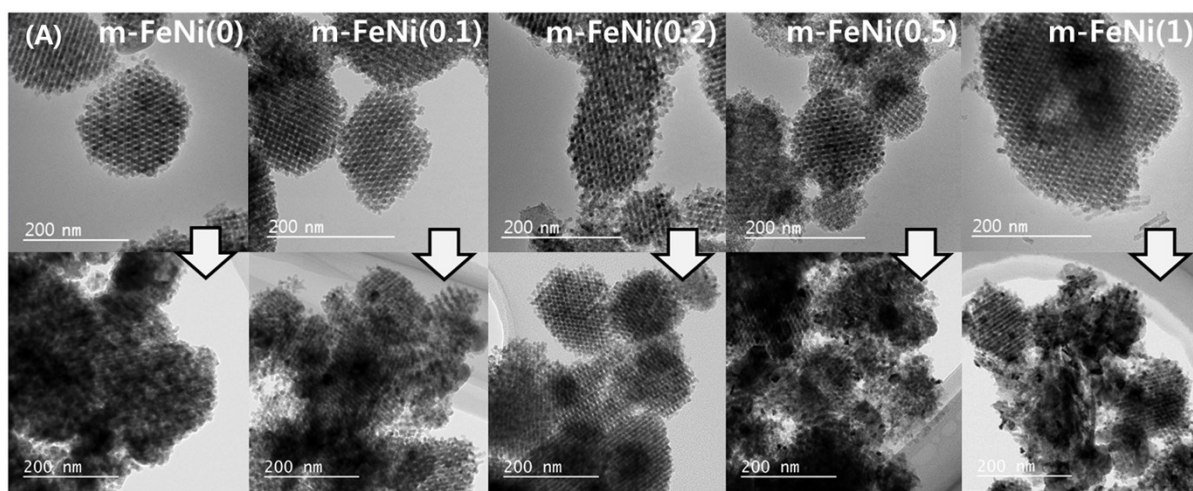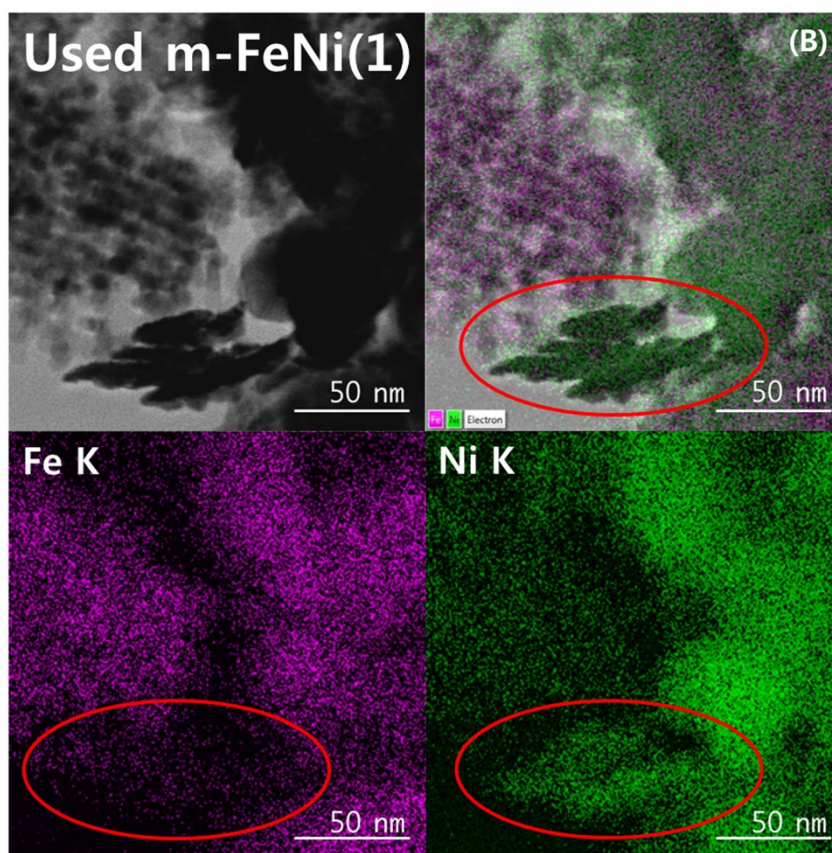

**Figure S4.** (A) TEM images of the fresh (upper figure) and used (bottom figure) m-FeNi catalysts with (B) EDS mapping images



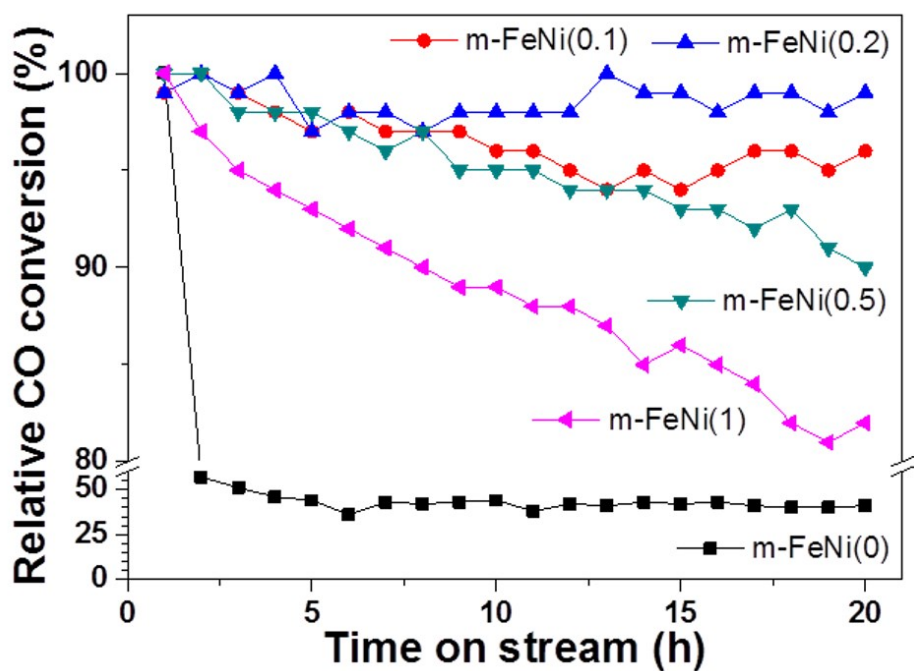

**Figure S5.** Relative CO conversion (based on the 100% CO conversion on the most active point for each catalyst) with time on stream (h) on the m-FeNi catalysts under the HT-WGS reaction conditions such as weight hourly space velocity (SV) of syngas (composition of  $N_2/CH_4/CO/CO_2/H_2 = 5.5/7.7/8.7/13.5/64.6$  mol%, typical composition of reformate after steam reforming of propane) with 5200 (ml/g<sub>cat</sub>·h), H<sub>2</sub>O/CO molar ratio of 4.5, T = 400 °C and ambient pressure

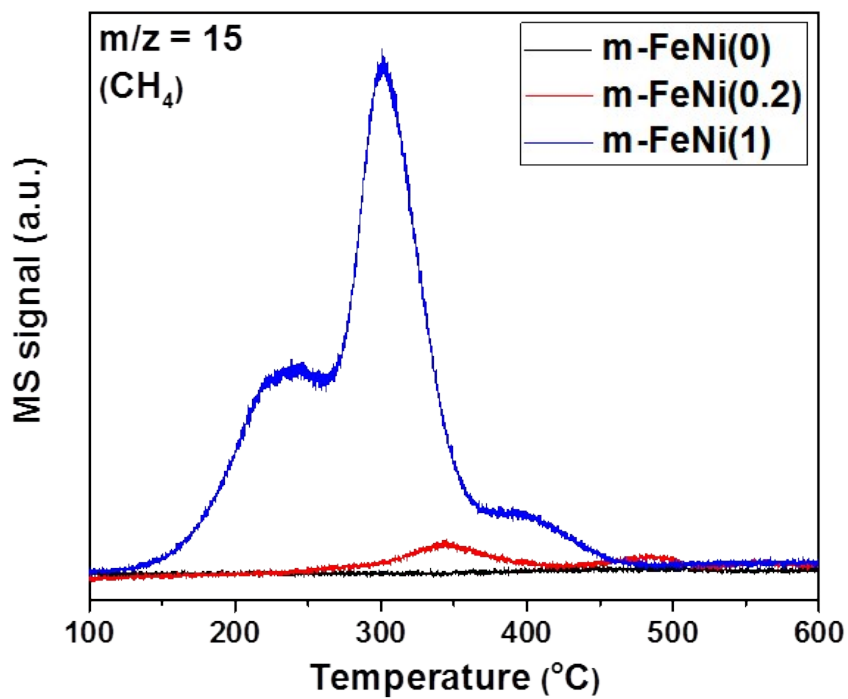

**Figure S6.** Spectra of temperature-programmed surface reaction with  $\text{H}_2$  ( $\text{H}_2$ -TPSR) with mass spectrometer to measure  $\text{CH}_4$  fragment ( $m/z = 15$ ) on the used m-FeNi(0), m-FeNi(0.2) and m-FeNi(1)

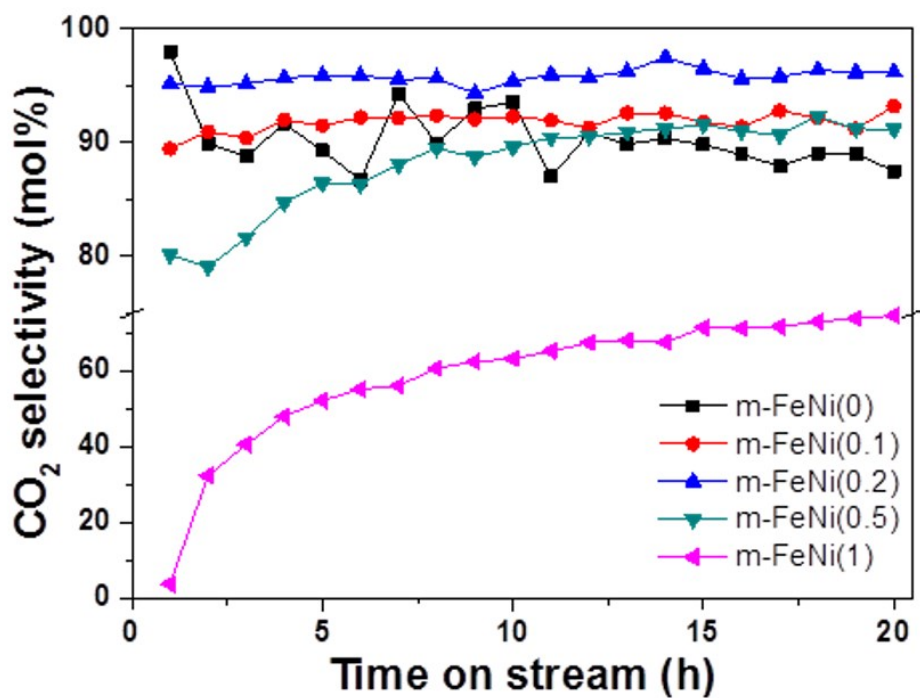

**Figure S7.** CO<sub>2</sub> selectivity with time on stream (h) of the m-FeNi catalysts under HT-WGS reaction conditions such as weight hourly space velocity (SV) of syngas (composition of N<sub>2</sub>/CH<sub>4</sub>/CO/CO<sub>2</sub>/H<sub>2</sub> = 5.5/7.7/8.7/13.5/64.6 mol%, typical composition of reformat after steam reforming of propane) with 5200 (ml/g<sub>cat</sub>·h), H<sub>2</sub>O/CO molar ratio of 4.5, T = 400 °C and ambient pressure

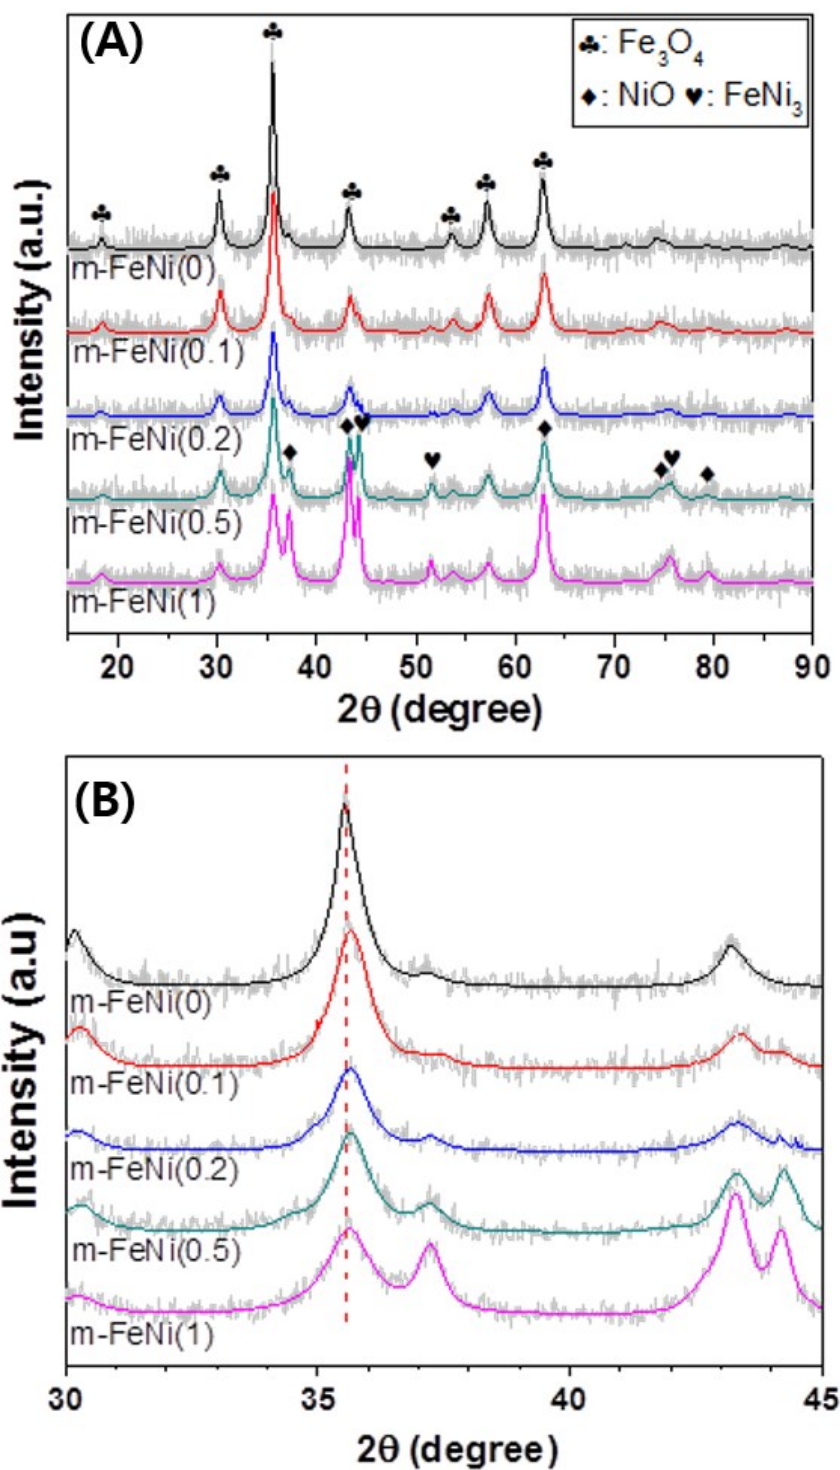

**Figure S8.** XRD patterns of the used m-FeNi catalysts; (A) wide angle XRD patterns for all crystalline phases and (B) XRD patterns in the range of 30 – 45° for phase confirmations

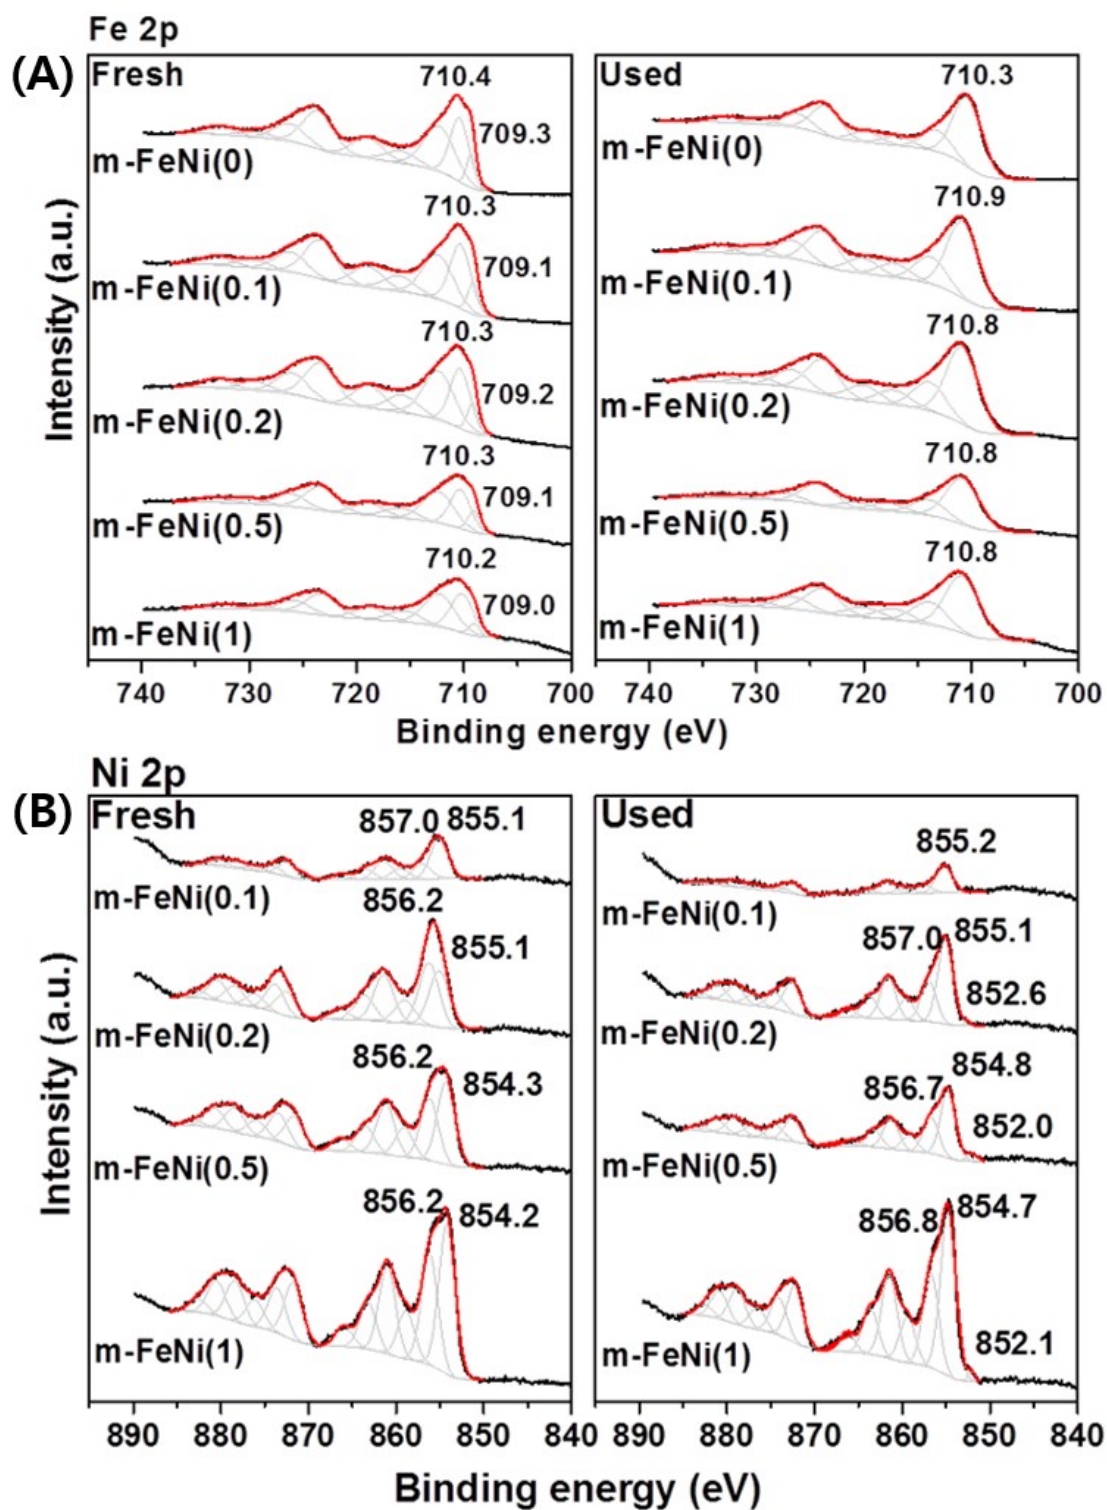

**Figure S9.** XPS spectra of the fresh (left) and used (right) m-FeNi catalysts; (A) Fe 2p spectra and (B) Ni 2p spectra with their characteristic binding energy (BE)
